# Supplementary material for: A monoclonal antibody targeting a large surface of the receptor binding motif shows pan-neutralizing SARS-CoV-2 activity
Source: PubMed Central journal article supplement (PMC10844294; doi:10.1038/s41467-024-45171-9), 2024-02-05
Supplement: 41467_2024_45171_MOESM3_ESM.pdf [file 41467_2024_45171_MOESM3_ESM.pdf]

## Reporting Summary

Nature Portfolio wishes to improve the reproducibility of the work that we publish. This form provides structure for consistency and transparency in reporting. For further information on Nature Portfolio policies, see our [Editorial Policies](#) and the [Editorial Policy Checklist](#).

### Statistics

For all statistical analyses, confirm that the following items are present in the figure legend, table legend, main text, or Methods section.

- | n/a                                 | Confirmed                                                                                                                                                                                                                                                                                      |
|-------------------------------------|------------------------------------------------------------------------------------------------------------------------------------------------------------------------------------------------------------------------------------------------------------------------------------------------|
| <input type="checkbox"/>            | <input checked="" type="checkbox"/> The exact sample size ( $n$ ) for each experimental group/condition, given as a discrete number and unit of measurement                                                                                                                                    |
| <input type="checkbox"/>            | <input checked="" type="checkbox"/> A statement on whether measurements were taken from distinct samples or whether the same sample was measured repeatedly                                                                                                                                    |
| <input type="checkbox"/>            | <input checked="" type="checkbox"/> The statistical test(s) used AND whether they are one- or two-sided<br><i>Only common tests should be described solely by name; describe more complex techniques in the Methods section.</i>                                                               |
| <input type="checkbox"/>            | <input checked="" type="checkbox"/> A description of all covariates tested                                                                                                                                                                                                                     |
| <input type="checkbox"/>            | <input checked="" type="checkbox"/> A description of any assumptions or corrections, such as tests of normality and adjustment for multiple comparisons                                                                                                                                        |
| <input type="checkbox"/>            | <input checked="" type="checkbox"/> A full description of the statistical parameters including central tendency (e.g. means) or other basic estimates (e.g. regression coefficient) AND variation (e.g. standard deviation) or associated estimates of uncertainty (e.g. confidence intervals) |
| <input type="checkbox"/>            | <input checked="" type="checkbox"/> For null hypothesis testing, the test statistic (e.g. $F$ , $t$ , $r$ ) with confidence intervals, effect sizes, degrees of freedom and $P$ value noted<br><i>Give <math>P</math> values as exact values whenever suitable.</i>                            |
| <input checked="" type="checkbox"/> | <input type="checkbox"/> For Bayesian analysis, information on the choice of priors and Markov chain Monte Carlo settings                                                                                                                                                                      |
| <input checked="" type="checkbox"/> | <input type="checkbox"/> For hierarchical and complex designs, identification of the appropriate level for tests and full reporting of outcomes                                                                                                                                                |
| <input checked="" type="checkbox"/> | <input type="checkbox"/> Estimates of effect sizes (e.g. Cohen's $d$ , Pearson's $r$ ), indicating how they were calculated                                                                                                                                                                    |

*Our web collection on [statistics for biologists](#) contains articles on many of the points above.*

### Software and code

Policy information about [availability of computer code](#)

Data collection

Data analysis

For manuscripts utilizing custom algorithms or software that are central to the research but not yet described in published literature, software must be made available to editors and reviewers. We strongly encourage code deposition in a community repository (e.g. GitHub). See the Nature Portfolio [guidelines for submitting code & software](#) for further information.

## Data

Policy information about [availability of data](#)

All manuscripts must include a [data availability statement](#). This statement should provide the following information, where applicable:

- Accession codes, unique identifiers, or web links for publicly available datasets
- A description of any restrictions on data availability
- For clinical datasets or third party data, please ensure that the statement adheres to our [policy](#)

The data that support this study are available from the corresponding authors upon reasonable request. The cryo-EM data generated in this study have been deposited in the Electron Microscopy Data Bank under accession codes EMD-16453 for SARS-CoV-2 spike trimer in complex with three 17T2 Fabs and EMD-1643 for RBD/17T2 Fab. The associated atomic models generated in this study have been deposited in the Protein Data Bank under accession code 8C89. Source data are provided with this paper. Further information and requests for resources and reagents should be directed to and will be fulfilled by the lead Contact, Giuliana Magri (gmagri@imim.es).

## Research involving human participants, their data, or biological material

Policy information about studies with [human participants or human data](#). See also policy information about [sex, gender \(identity/presentation\), and sexual orientation](#) and [race, ethnicity and racism](#).

Reporting on sex and gender

Reporting on race, ethnicity, or other socially relevant groupings

Population characteristics

Recruitment

Ethics oversight

Note that full information on the approval of the study protocol must also be provided in the manuscript.

## Field-specific reporting

Please select the one below that is the best fit for your research. If you are not sure, read the appropriate sections before making your selection.

Life sciences  Behavioural & social sciences  Ecological, evolutionary & environmental sciences

For a reference copy of the document with all sections, see [nature.com/documents/nr-reporting-summary-flat.pdf](https://nature.com/documents/nr-reporting-summary-flat.pdf)

## Life sciences study design

All studies must disclose on these points even when the disclosure is negative.

Sample size

Data exclusions

Replication

Randomization

Blinding

# Reporting for specific materials, systems and methods

We require information from authors about some types of materials, experimental systems and methods used in many studies. Here, indicate whether each material, system or method listed is relevant to your study. If you are not sure if a list item applies to your research, read the appropriate section before selecting a response.

## Materials & experimental systems

| n/a                                 | Involvement                                                     |
|-------------------------------------|-----------------------------------------------------------------|
| <input type="checkbox"/>            | <input checked="" type="checkbox"/> Involved in the study       |
| <input type="checkbox"/>            | <input checked="" type="checkbox"/> Antibodies                  |
| <input type="checkbox"/>            | <input checked="" type="checkbox"/> Eukaryotic cell lines       |
| <input checked="" type="checkbox"/> | <input type="checkbox"/> Palaeontology and archaeology          |
| <input type="checkbox"/>            | <input checked="" type="checkbox"/> Animals and other organisms |
| <input checked="" type="checkbox"/> | <input type="checkbox"/> Clinical data                          |
| <input checked="" type="checkbox"/> | <input type="checkbox"/> Dual use research of concern           |
| <input checked="" type="checkbox"/> | <input type="checkbox"/> Plants                                 |

## Methods

| n/a                                 | Involvement                                        |
|-------------------------------------|----------------------------------------------------|
| <input checked="" type="checkbox"/> | <input type="checkbox"/> Involved in the study     |
| <input checked="" type="checkbox"/> | <input type="checkbox"/> ChIP-seq                  |
| <input type="checkbox"/>            | <input checked="" type="checkbox"/> Flow cytometry |
| <input checked="" type="checkbox"/> | <input type="checkbox"/> MRI-based neuroimaging    |

## Antibodies

### Antibodies used

anti-human CD19 PE-Cy7 (clone: HIB19, source: Biolegend, Reference: Cat# 302216; RRID:AB\_314246), anti-human IgM Brilliant Violet 605 (clone: MHM-88, source: Biolegend, Reference: Cat# 314524; RRID:AB\_2562374), anti-human IgD PE-CF594 (clone: IA6-2, source: BD Biosciences, Reference: Cat# 562540; RRID:AB\_11153129), anti-human HLA-DR Alexa Fluor 700 (clone: L243, source: Biolegend, Reference: Cat# 307626; RRID:AB\_493771), anti-human CD11c APC-cy7 (clone: Bu15, source: Biolegend, Reference: Cat# 337217; RRID:AB\_10661724), anti-human CD27 PE (clone: O323, source: eBioscience, Reference: Cat# 12-0279-42; RRID:AB\_10718394), anti-human CD21 PE-cy5 (clone: B-ly4, source: BD Biosciences, Reference: Cat# 551064; RRID:AB\_394028), anti-human IgA VioGreen (clone: IS11-8E10, source: Miltenyi Biotec, Reference: Cat# 130-114-007; RRID:AB\_2734098), anti-human Ig light chain  $\lambda$  PerCP-cy5.5 (clone: MHL-38, source: Biolegend, Reference: Cat# 316617; RRID:AB\_2561511), horseradish peroxidase (HRP)-conjugated anti-human IgG secondary antibody (source: Southern Biotech, Reference: 2042-05, dilution 1:4000), Human IgG1 purified from serum of a myeloma patient (source: Binding Site Company, Reference: BP078), rabbit monoclonal antibody (source: Sino Biological, Reference: 40143-R019, dilution 1:15000), 17T2 mAb (reported in this study), 131T2 (reported in this study), 54T1 (reported in this study), 130T1 (reported in this study), 119T2 (reported in this study), Human Anti-SARS-CoV-2 Spike-RBD S309 Neutralizing mAb (source: Cell Sciences, Reference: CPC525A), Anti SARS-CoV-2 RBD Neutralizing antibody S2E12 (source: Proteogenix, Reference: PTXCOV-A579), Recombinant anti-Human Immunodeficiency Virus type 1 gp120 monoclonal IgG1 antibody (source: Polymun Scientific, Reference: ABO11).

### Validation

All commercial antibodies were validated by the manufacturer per their associated DataSheets. Company statement on validation: Each lot product is validated by QC testing with a series of titration dilutions. The antibodies reported in this study were validated using SARS-CoV-2 RBD proteins by ELISA and its specificity was compared to a human IgG1 purified from serum of a myeloma patient (Binding Site Company, BP078; used as a negative control)

## Eukaryotic cell lines

Policy information about [cell lines and Sex and Gender in Research](#)

### Cell line source(s)

Expi293F human cells (Thermo Fisher Scientific), HEK293T cells overexpressing wild-type human ACE-2 (Integral Molecular), Vero E6 cells (ATCC CRL-1586)

### Authentication

The cell lines were not authenticated

### Mycoplasma contamination

All cell lines are routinely tested each month and were negative for mycoplasma

### Commonly misidentified lines (See [ICLAC](#) register)

This study did not involve any commonly misidentified cell lines

## Animals and other research organisms

Policy information about [studies involving animals; ARRIVE guidelines](#) recommended for reporting animal research, and [Sex and Gender in Research](#)

### Laboratory animals

B6. CgTg(K18-ACE2)2PrImn/J (or K18-hACE2) hemizygous transgenic mice (034860, Jackson Immunoresearch, West Grove, PA, United States) were bred, genotyped and maintained at CMCiB. A total of 44 adult K18-hACE2 hemizygous mice (aged 6-14 weeks) were used in this experiment. Specific housing conditions are described in the manuscript.

|                         |                                                                                                                                                                                               |
|-------------------------|-----------------------------------------------------------------------------------------------------------------------------------------------------------------------------------------------|
| Wild animals            | No wild animals were used in this study                                                                                                                                                       |
| Reporting on sex        | K18-hACE2 mice were distributed in sex-balanced groups. Disaggregated data is available in the Source Data file.                                                                              |
| Field-collected samples | No field-collected samples were used in this study                                                                                                                                            |
| Ethics oversight        | All animal procedures were performed under the approval of the Committee on the Ethics of Animal Experimentation of the IGTP and the authorization of Generalitat de Catalunya (code: 11222). |

Note that full information on the approval of the study protocol must also be provided in the manuscript.

## Plants

|                       |                              |
|-----------------------|------------------------------|
| Seed stocks           | Not applicable in this study |
| Novel plant genotypes | Not applicable in this study |
| Authentication        | Not applicable in this study |

## Flow Cytometry

### Plots

Confirm that:

- The axis labels state the marker and fluorochrome used (e.g. CD4-FITC).
- The axis scales are clearly visible. Include numbers along axes only for bottom left plot of group (a 'group' is an analysis of identical markers).
- All plots are contour plots with outliers or pseudocolor plots.
- A numerical value for number of cells or percentage (with statistics) is provided.

### Methodology

|                           |                                                                                                                                                                                                                                                                                                                                                                                                                                                                                                                                                                                                                                                                                                                                                                                                                                                                |
|---------------------------|----------------------------------------------------------------------------------------------------------------------------------------------------------------------------------------------------------------------------------------------------------------------------------------------------------------------------------------------------------------------------------------------------------------------------------------------------------------------------------------------------------------------------------------------------------------------------------------------------------------------------------------------------------------------------------------------------------------------------------------------------------------------------------------------------------------------------------------------------------------|
| Sample preparation        | For the isolation of WH1 SARS-CoV-2 spike-specific B cells, 26.4 pmol His-Tagged Biotinylated SARS-CoV-2 (2019-nCoV) spike RBD Recombinant Protein (Sino Biological Inc.; cat number: 40592-VO8H-B) was firstly incubated for 1 hour with 3.78 pmol Streptavidin Alexa Fluor 647 (Thermo Fisher Scientific) and Streptavidin Alexa Fluor 488 (Thermo Fisher Scientific), separately. Next, PBMCs were incubated with the fluorescently labelled RBD probes and with a cocktail of fluorescent conjugated antibodies containing anti-CD19 Pe-Cy7, anti-IgM BV605, anti HLA-DR AF700, anti CD38 APC-cy7, anti Igλ light chain PerCPCy5.5 (all from Biolegend), anti-IgD PE CF594 (BD Bioscience), anti-CD21 PE-cy5 (BD Bioscience) and anti-IgA Viogreen (Miltenyi). Dead cells were excluded through the use of 4'-6'-diamidine-2'-phenylindole (DAPI) (Sigma). |
| Instrument                | FACSAria II (BD Biosciences)                                                                                                                                                                                                                                                                                                                                                                                                                                                                                                                                                                                                                                                                                                                                                                                                                                   |
| Software                  | FACSDiva software (Becton Dickinson) was used for acquisition and FlowJo for post-sorting analysis                                                                                                                                                                                                                                                                                                                                                                                                                                                                                                                                                                                                                                                                                                                                                             |
| Cell population abundance | WH1 SARS-CoV-2 RBD-specific B cells were approximately 0.15% within all live B cells (DAPI- CD19+)                                                                                                                                                                                                                                                                                                                                                                                                                                                                                                                                                                                                                                                                                                                                                             |
| Gating strategy           | Alive DAPI- CD19+ RBD+ B cells were single-cell index sorted into empty 96-well PCR plates (VWR)                                                                                                                                                                                                                                                                                                                                                                                                                                                                                                                                                                                                                                                                                                                                                               |

- Tick this box to confirm that a figure exemplifying the gating strategy is provided in the Supplementary Information.
